# Supplementary material for: Development and validation of near-infrared spectroscopy for the prediction of forage quality parameters in Lolium multiflorum
Source: PeerJ. 2017 Oct 3;5:e3867. doi: 10.7717/peerj.3867 (PMC5629960; doi:10.7717/peerj.3867)
Supplement: Table S1 [file peerj-05-3867-s001.xlsx]

## Sheet: Sheet1
	Laboratory data (%DM)				Spectral data (cm-1)
	CP	NDF	ADF	WSC	12493.2	12489.3	12485.5	12481.6	12477.7	12473.9	12470	12466.2	12462.3	12458.5	12454.6	12450.7	12446.9	12443	12439.2	12435.3	12431.5	12427.6	12423.7	12419.9	12416	12412.2	12408.3	12404.5	12400.6	12396.7	12392.9	12389	12385.2	12381.3	12377.5	12373.6	12369.8	12365.9	12362	12358.2	12354.3	12350.5	12346.6	12342.8	12338.9	12335	12331.2	12327.3	12323.5
Sample-1	14.5	32.6211	17.3262	30.686	0.368026	0.369918	0.37137	0.371219	0.370543	0.370252	0.37093	0.371038	0.36956	0.368829	0.36929	0.369389	0.368579	0.367199	0.367206	0.368553	0.368498	0.367277	0.367021	0.367125	0.366723	0.366869	0.36776	0.368245	0.367735	0.366678	0.365494	0.36489	0.364966	0.364338	0.363417	0.363942	0.365293	0.365713	0.365277	0.364354	0.362911	0.362113	0.362078	0.361759	0.361202	0.36044	0.359214	0.358807	0.360288
Sample-2	13.9	34.2458	18.2686	28.1135	0.388782	0.390479	0.392339	0.392183	0.391455	0.391147	0.391687	0.391458	0.389272	0.38849	0.389947	0.3909	0.389791	0.387018	0.385574	0.386219	0.386127	0.385441	0.386176	0.387211	0.387303	0.387165	0.387518	0.388182	0.388088	0.387451	0.3869	0.386004	0.384824	0.384114	0.384282	0.384522	0.384741	0.385623	0.386066	0.385075	0.383367	0.382308	0.38281	0.383102	0.381705	0.380548	0.380421	0.380499	0.380773
Sample-3	12.59	22.6538	11.662	34.8258	0.647264	0.648536	0.648619	0.649734	0.650423	0.648741	0.649354	0.650016	0.64748	0.647425	0.648067	0.646273	0.644145	0.640583	0.637782	0.637432	0.636849	0.63643	0.63775	0.638288	0.637073	0.639162	0.644986	0.648229	0.645853	0.640874	0.637157	0.634696	0.631928	0.629982	0.631081	0.634332	0.635727	0.6341	0.634391	0.636791	0.635229	0.631772	0.630486	0.62932	0.628882	0.630727	0.632112	0.631143	0.629731
Sample-4	11.44	24.1434	14.7708	33.7509	0.700511	0.700972	0.6996	0.699807	0.701899	0.703197	0.704656	0.703167	0.699036	0.698468	0.699645	0.700429	0.700842	0.698606	0.697679	0.698643	0.695586	0.691707	0.692423	0.693314	0.691129	0.691426	0.696686	0.701159	0.70043	0.696414	0.692083	0.689597	0.689236	0.688798	0.688627	0.689754	0.691499	0.693398	0.694622	0.694146	0.691657	0.690161	0.691251	0.690683	0.687538	0.685318	0.684018	0.682963	0.683498
Sample-5	14.48	30.7861	15.2885	30.3311	0.658593	0.657851	0.657144	0.657347	0.6585	0.658693	0.659559	0.65934	0.655231	0.653012	0.655249	0.658108	0.6583	0.654907	0.652773	0.653792	0.653211	0.651029	0.65006	0.648377	0.645489	0.646067	0.650538	0.652835	0.651163	0.648764	0.646848	0.646322	0.646986	0.646112	0.644449	0.644359	0.64445	0.643527	0.643009	0.642779	0.642092	0.641948	0.641373	0.639841	0.63994	0.641867	0.642956	0.64223	0.641251
Sample-6	12.89	29.4512	16.1991	22.3318	0.687066	0.688883	0.689405	0.690168	0.689986	0.687483	0.687939	0.688771	0.686291	0.686635	0.688775	0.688668	0.688485	0.688432	0.689591	0.690979	0.688006	0.683946	0.684096	0.683683	0.679153	0.678022	0.683727	0.688663	0.687507	0.683971	0.681409	0.67992	0.679188	0.677407	0.674898	0.673903	0.673569	0.672235	0.671945	0.673885	0.675422	0.676114	0.67649	0.675909	0.675643	0.676495	0.676117	0.673798	0.67226
Sample-7	13.39	38.7353	22.0304	17.8617	0.666246	0.669183	0.67055	0.668792	0.66686	0.666706	0.669893	0.671956	0.668926	0.668325	0.671353	0.671828	0.669353	0.664825	0.660794	0.660567	0.663027	0.665292	0.665564	0.662999	0.658788	0.657268	0.660762	0.66454	0.664008	0.660843	0.657927	0.656617	0.656134	0.655462	0.65574	0.656301	0.655602	0.654759	0.654243	0.653036	0.651415	0.650235	0.649308	0.64853	0.648781	0.649853	0.650727	0.651285	0.652166
Sample-8	11.08	37.5166	21.2474	23.08	0.635787	0.63482	0.634292	0.635831	0.637596	0.637552	0.638024	0.636381	0.631327	0.630719	0.634225	0.634999	0.63247	0.628537	0.62686	0.629016	0.629906	0.627723	0.626932	0.626817	0.624716	0.624814	0.629248	0.632793	0.631668	0.627738	0.623853	0.621815	0.621235	0.619843	0.618813	0.620603	0.622887	0.622807	0.621795	0.621659	0.622266	0.623578	0.624231	0.621991	0.619473	0.620375	0.62144	0.619787	0.618267
Sample-9	15	37.9668	21.3727	21.7165	0.655623	0.655779	0.655115	0.655917	0.657777	0.658044	0.659855	0.659709	0.65344	0.650484	0.653641	0.656544	0.656094	0.652125	0.6503	0.651532	0.65027	0.649621	0.652092	0.65087	0.645018	0.642745	0.647477	0.652555	0.651231	0.646787	0.644206	0.644161	0.644929	0.64308	0.640477	0.641567	0.643946	0.643175	0.641186	0.641549	0.642658	0.642972	0.642587	0.641439	0.641425	0.642783	0.642328	0.640042	0.639978
Sample-10	11.55	33.3646	17.966	28.42	0.669148	0.669665	0.668945	0.668386	0.668279	0.666341	0.666976	0.670004	0.669439	0.668627	0.670471	0.671884	0.670303	0.665948	0.663888	0.664917	0.664577	0.663002	0.662451	0.661504	0.659568	0.660678	0.665499	0.668655	0.667119	0.662846	0.659756	0.659659	0.659311	0.656894	0.655118	0.654891	0.65604	0.658238	0.659712	0.659622	0.658182	0.657143	0.657095	0.655595	0.654076	0.654749	0.653682	0.650542	0.650712
Sample-11	12.54	42.376	24.2415	19.1637	0.658095	0.65861	0.659836	0.661422	0.661696	0.661225	0.663184	0.66421	0.661578	0.660347	0.661467	0.663213	0.664501	0.661889	0.656999	0.654556	0.655084	0.657612	0.659979	0.657322	0.650856	0.649847	0.656242	0.660677	0.658212	0.65468	0.65336	0.651832	0.649588	0.647788	0.647671	0.648673	0.648392	0.647631	0.648872	0.650515	0.650161	0.649826	0.650491	0.650167	0.648956	0.64743	0.645453	0.644284	0.645485
Sample-12	7.16	33.4144	18.3321	38.6066	0.65732	0.656876	0.656121	0.657277	0.657748	0.654903	0.653762	0.652909	0.650346	0.650722	0.652001	0.652371	0.653218	0.651835	0.649511	0.649512	0.649634	0.647832	0.646046	0.646136	0.647412	0.648411	0.648943	0.648493	0.646673	0.64501	0.644305	0.644654	0.64565	0.645568	0.644184	0.643182	0.642334	0.6409	0.640781	0.641361	0.640651	0.640671	0.641667	0.641006	0.639708	0.639219	0.637176	0.634755	0.63645
Sample-13	9.79	36.053	20.2597	24.907	0.674793	0.677465	0.679374	0.679251	0.676535	0.67327	0.673954	0.673943	0.669166	0.667043	0.6693	0.671414	0.671534	0.66985	0.670377	0.671859	0.668913	0.665369	0.665857	0.666175	0.663602	0.663243	0.667718	0.670732	0.667457	0.662989	0.661662	0.661233	0.659763	0.658033	0.657977	0.659235	0.659497	0.658822	0.65939	0.660999	0.660223	0.658043	0.658079	0.659364	0.660829	0.66168	0.659892	0.657577	0.657928
Sample-14	9.58	31.6004	16.6386	31.4356	0.664487	0.666964	0.669899	0.670598	0.667926	0.662798	0.66151	0.662426	0.658488	0.655074	0.6571	0.660258	0.661229	0.66011	0.659286	0.658423	0.655005	0.653246	0.657471	0.66065	0.657441	0.655572	0.659361	0.662182	0.659617	0.654724	0.650683	0.648327	0.647583	0.647736	0.648645	0.649432	0.648624	0.647448	0.648171	0.650174	0.651026	0.651053	0.651164	0.65028	0.650187	0.651607	0.650437	0.646815	0.645509
Sample-15	12.22	37.1211	21.3695	19.8047	0.6762	0.675854	0.674688	0.674734	0.675323	0.674615	0.676132	0.67639	0.671785	0.670852	0.67344	0.673644	0.671861	0.668684	0.668368	0.671435	0.671259	0.668252	0.668306	0.669514	0.667207	0.666565	0.671595	0.674897	0.672302	0.668568	0.665407	0.66263	0.660976	0.659853	0.660951	0.663914	0.663777	0.660455	0.658814	0.659643	0.660693	0.661747	0.661368	0.659271	0.659008	0.659295	0.656749	0.654935	0.656832
Sample-16	9.18	36.3873	20.6093	23.3938	0.648789	0.650219	0.651334	0.652398	0.651568	0.648276	0.64662	0.646008	0.644504	0.645329	0.647815	0.649119	0.648333	0.646904	0.647291	0.646495	0.643283	0.642164	0.643225	0.6425	0.640511	0.640882	0.643789	0.646263	0.646302	0.643727	0.639551	0.636949	0.637111	0.636879	0.635731	0.635612	0.634679	0.632897	0.634219	0.63676	0.636859	0.636978	0.637282	0.634749	0.631592	0.631499	0.633148	0.634108	0.635001
Sample-17	15.95	28.4893	18.9918	15.1011	0.668359	0.666408	0.66582	0.669179	0.672206	0.670254	0.670109	0.670434	0.664549	0.661372	0.665444	0.670337	0.672012	0.669288	0.665697	0.66384	0.661782	0.660151	0.660269	0.660565	0.660733	0.662346	0.664588	0.665152	0.664056	0.661438	0.657657	0.655903	0.656648	0.656419	0.65443	0.652994	0.652742	0.652358	0.653158	0.655885	0.656779	0.655362	0.65406	0.653562	0.654327	0.654689	0.653497	0.65168	0.649701
Sample-18	14.09	44.2175	24.8269	16.8204	0.685402	0.684926	0.68486	0.686068	0.685747	0.684213	0.685862	0.686394	0.681216	0.678816	0.68259	0.685195	0.681639	0.675312	0.674371	0.677611	0.677903	0.676862	0.67785	0.676656	0.671414	0.668837	0.672572	0.678034	0.680299	0.678154	0.673514	0.670049	0.668546	0.66836	0.669798	0.670365	0.667898	0.665914	0.667799	0.670816	0.671464	0.670925	0.670756	0.669608	0.666865	0.664408	0.663521	0.663435	0.663899
Sample-19	18.36	37.5978	20.4007	13.2161	0.675805	0.677087	0.678038	0.680093	0.680445	0.676772	0.675669	0.676499	0.672928	0.669666	0.669932	0.670567	0.668793	0.665196	0.665778	0.66908	0.668779	0.668311	0.670769	0.670771	0.667067	0.665839	0.668151	0.669549	0.669613	0.6703	0.66996	0.667236	0.66408	0.661562	0.660179	0.660386	0.660274	0.660203	0.662874	0.665458	0.664677	0.662931	0.661749	0.660287	0.6593	0.658659	0.657384	0.656996	0.6576
Sample-20	21.5	36.6555	21.2684	11.1662	0.713538	0.71717	0.721115	0.723647	0.723583	0.720915	0.720199	0.719736	0.714826	0.711321	0.712513	0.71423	0.713463	0.710804	0.711221	0.714023	0.712561	0.708651	0.708104	0.708808	0.708187	0.709459	0.713135	0.714682	0.713185	0.711655	0.709475	0.706909	0.705238	0.702701	0.700839	0.701503	0.70267	0.703101	0.704292	0.705799	0.704157	0.700987	0.699872	0.699502	0.698343	0.697454	0.69792	0.699235	0.701041
Sample-21	18.22	41.9919	23.3769	10.8041	0.683281	0.684346	0.684051	0.685184	0.68502	0.679918	0.677528	0.679177	0.679162	0.680046	0.682807	0.685134	0.685655	0.682274	0.679061	0.678663	0.676525	0.67369	0.674682	0.676292	0.675747	0.676473	0.678798	0.679595	0.678142	0.676469	0.6752	0.673344	0.670893	0.668331	0.667146	0.667898	0.668862	0.66919	0.67076	0.67373	0.674031	0.671081	0.668634	0.667379	0.666961	0.668212	0.669102	0.668475	0.668036
Sample-22	10.18	37.533	20.338	33.6395	0.661064	0.660711	0.661863	0.663543	0.662704	0.659916	0.660613	0.662163	0.658503	0.656158	0.660222	0.665126	0.664875	0.6604	0.658437	0.660083	0.660947	0.659834	0.657814	0.654623	0.65169	0.653341	0.658647	0.661209	0.658872	0.655144	0.652733	0.651122	0.648891	0.646772	0.64663	0.647361	0.646281	0.64524	0.647907	0.651238	0.651614	0.651941	0.652903	0.652471	0.651889	0.651256	0.64893	0.646593	0.646361
Sample-23	8.87	34.8222	19.5223	35.0802	0.410764	0.413786	0.414662	0.41287	0.410394	0.409281	0.409883	0.409901	0.408351	0.407005	0.406894	0.408334	0.409799	0.409396	0.408555	0.408257	0.408043	0.408269	0.408488	0.4079	0.407025	0.40641	0.406435	0.407414	0.408112	0.408301	0.408782	0.408246	0.406674	0.405568	0.404805	0.404022	0.403213	0.403002	0.403805	0.404239	0.403562	0.402997	0.402602	0.40122	0.400191	0.400715	0.400848	0.400524	0.401868
Sample-24	12.72	36.6557	20.8564	22.7609	0.43766	0.437894	0.438972	0.439566	0.439403	0.438126	0.438293	0.439465	0.438043	0.436334	0.437269	0.438429	0.437889	0.436958	0.436726	0.436527	0.435598	0.434619	0.434894	0.43505	0.433488	0.43284	0.434432	0.435055	0.433296	0.431608	0.431715	0.432504	0.43235	0.431099	0.429857	0.429594	0.429688	0.429445	0.429798	0.430367	0.429537	0.428699	0.429345	0.429477	0.427838	0.425639	0.424214	0.424758	0.426997
Sample-25	9.13	41.5143	23.8111	22.9248	0.667554	0.670468	0.669624	0.668849	0.670285	0.670947	0.673135	0.674447	0.670163	0.667516	0.668294	0.667109	0.665655	0.665609	0.666101	0.666166	0.663475	0.660543	0.662132	0.664647	0.663322	0.661802	0.663536	0.665203	0.664051	0.661994	0.66037	0.660047	0.660601	0.659183	0.656532	0.654946	0.653893	0.653207	0.654863	0.658672	0.660704	0.659262	0.656284	0.653781	0.653244	0.654949	0.656339	0.654758	0.652942
Sample-26	12.52	40.2551	22.8763	21.9167	0.64887	0.650765	0.651398	0.651097	0.650794	0.649898	0.650942	0.651123	0.648402	0.648909	0.651834	0.652173	0.648921	0.64334	0.641516	0.644455	0.646039	0.64591	0.646435	0.645699	0.642727	0.641601	0.645159	0.649231	0.650052	0.649661	0.64866	0.645847	0.642067	0.638685	0.638023	0.639894	0.640509	0.639836	0.641032	0.643421	0.644109	0.643379	0.641401	0.638217	0.636538	0.635882	0.633828	0.632042	0.633209
Sample-27	11.13	42.9463	24.0572	17.4958	0.406832	0.407589	0.408494	0.408659	0.408672	0.408994	0.409586	0.409244	0.407726	0.406981	0.406815	0.406442	0.406072	0.405041	0.404255	0.404602	0.404969	0.40503	0.404627	0.403312	0.402351	0.403031	0.404929	0.406905	0.407553	0.406905	0.405908	0.40486	0.404143	0.403593	0.403583	0.404437	0.404511	0.403803	0.404232	0.404492	0.403043	0.402603	0.403713	0.403428	0.40173	0.400651	0.40069	0.401131	0.401386
Sample-28	12.27	40.3678	23.4475	23.0337	0.729616	0.728645	0.728893	0.729772	0.728158	0.72468	0.724823	0.724356	0.720299	0.719816	0.722558	0.724488	0.724702	0.722497	0.720977	0.720327	0.717614	0.716209	0.719333	0.720482	0.715914	0.71504	0.720376	0.72303	0.721341	0.719282	0.71746	0.715004	0.71188	0.709685	0.70975	0.711484	0.71275	0.711841	0.710842	0.711222	0.710546	0.70874	0.70727	0.705705	0.705273	0.706079	0.705072	0.703683	0.705689
Sample-29	10.42	42.0174	24.3309	17.4149	0.702073	0.704161	0.702629	0.701374	0.700986	0.698266	0.696454	0.695851	0.693847	0.694684	0.698261	0.700478	0.700953	0.698891	0.696865	0.696472	0.694474	0.692261	0.692505	0.693319	0.693107	0.693256	0.694442	0.694836	0.694065	0.692594	0.690502	0.690809	0.692991	0.690998	0.686658	0.68634	0.688706	0.689754	0.689498	0.689442	0.68918	0.688429	0.687061	0.684229	0.682483	0.684101	0.685551	0.684231	0.683097
Sample-30	10.2	41.6043	24.1475	21.2381	0.717543	0.719984	0.721447	0.719162	0.71556	0.715164	0.718795	0.71911	0.714201	0.711686	0.712232	0.712902	0.712227	0.709063	0.707123	0.708066	0.709136	0.710106	0.711445	0.710883	0.70804	0.707292	0.710594	0.714104	0.713532	0.709028	0.704987	0.704234	0.704577	0.703551	0.70273	0.702644	0.700847	0.699018	0.700224	0.701074	0.698816	0.696784	0.696146	0.695974	0.696839	0.697266	0.695904	0.694152	0.694654
Sample-31	9.61	45.8467	25.6853	12.769	0.702664	0.703539	0.704421	0.704308	0.70348	0.703722	0.70641	0.707384	0.704343	0.70289	0.705429	0.70793	0.706997	0.703765	0.702614	0.702959	0.701935	0.701203	0.701584	0.700743	0.697927	0.697516	0.702148	0.705256	0.70226	0.697497	0.694461	0.693245	0.692375	0.69041	0.688582	0.687835	0.687852	0.689306	0.692486	0.695077	0.694626	0.692867	0.69209	0.691414	0.690876	0.691629	0.691872	0.689445	0.687614
Sample-32	11.27	41.9212	25.4613	16.5711	0.748172	0.74586	0.740385	0.738771	0.740648	0.741057	0.7424	0.74375	0.741712	0.740304	0.740416	0.740303	0.739957	0.73811	0.736549	0.737104	0.737542	0.736537	0.735068	0.73411	0.734137	0.73511	0.738129	0.74211	0.742643	0.739075	0.734087	0.730836	0.730534	0.73188	0.733769	0.733708	0.730467	0.727603	0.728168	0.730372	0.732481	0.734422	0.73387	0.729531	0.724834	0.724934	0.72956	0.733963	0.736648
Sample-33	7.55	45.9886	27.5949	19.5283	0.702963	0.708678	0.713875	0.715747	0.71466	0.711173	0.709407	0.708712	0.705478	0.702714	0.702681	0.70444	0.704184	0.700488	0.700014	0.703635	0.705045	0.704872	0.706621	0.706028	0.700542	0.697684	0.701456	0.705503	0.704014	0.699401	0.696352	0.695776	0.696592	0.696988	0.695458	0.693912	0.693636	0.692721	0.691022	0.689319	0.687847	0.687383	0.6879	0.689292	0.690984	0.692018	0.692507	0.692605	0.692646
Sample-34	9.62	45.3644	27.3327	14.1566	0.701031	0.704175	0.705945	0.703992	0.700521	0.697612	0.698374	0.699519	0.699439	0.702068	0.704714	0.704828	0.702241	0.697658	0.697074	0.699504	0.698863	0.698126	0.699936	0.698808	0.694431	0.695087	0.701179	0.703945	0.700772	0.696464	0.694387	0.694055	0.693301	0.692484	0.692935	0.692709	0.690661	0.688156	0.687373	0.688992	0.689314	0.687249	0.685358	0.684394	0.684833	0.685719	0.685721	0.685613	0.685418
Sample-35	6.88	42.4911	24.9258	21.9545	0.45047	0.451416	0.451937	0.452211	0.452307	0.451898	0.452198	0.452285	0.451205	0.451419	0.45306	0.453628	0.452436	0.449897	0.447957	0.448291	0.449364	0.449656	0.449212	0.447926	0.446271	0.445492	0.446096	0.447307	0.447596	0.446461	0.444979	0.444267	0.444427	0.444553	0.444566	0.444992	0.445406	0.445979	0.446586	0.445654	0.443595	0.442612	0.442738	0.442648	0.442634	0.443186	0.443252	0.442943	0.443461
Sample-36	14.83	43.5621	26.2564	10.9113	0.412378	0.413596	0.414334	0.415199	0.415948	0.415047	0.414346	0.414329	0.412865	0.411238	0.411087	0.411354	0.410713	0.409705	0.410325	0.412012	0.412748	0.412751	0.412403	0.410978	0.409026	0.408461	0.409687	0.410799	0.410536	0.410055	0.409864	0.409284	0.408786	0.408077	0.406749	0.406211	0.406678	0.407405	0.40863	0.40915	0.407641	0.406029	0.405721	0.405827	0.405857	0.405535	0.405036	0.405577	0.407237
Sample-37	9.58	43.1867	25.8649	18.8384	0.503577	0.50605	0.507351	0.506903	0.505923	0.505317	0.506326	0.506122	0.503267	0.502394	0.503812	0.504169	0.503202	0.50199	0.502052	0.503179	0.50335	0.502507	0.501507	0.500333	0.500084	0.501743	0.503686	0.504101	0.503194	0.502332	0.501909	0.501225	0.500388	0.499568	0.498695	0.498497	0.498966	0.499144	0.499391	0.499904	0.499895	0.500389	0.501484	0.500798	0.498621	0.497391	0.49751	0.498005	0.498654
Sample-38	7.36	53.5067	31.9026	10.813	0.473861	0.475311	0.47607	0.476615	0.476743	0.476288	0.477381	0.477968	0.475953	0.475195	0.476748	0.477913	0.476863	0.473822	0.472519	0.473678	0.473795	0.47223	0.470772	0.470019	0.469792	0.470565	0.472347	0.473513	0.472599	0.470897	0.47057	0.470891	0.470445	0.469554	0.468769	0.468387	0.468331	0.468651	0.469712	0.470076	0.468665	0.467568	0.467861	0.468325	0.467976	0.466684	0.465616	0.465868	0.466917
Sample-39	8.87	53.7415	32.0952	10.4645	0.426776	0.428187	0.427888	0.426713	0.42587	0.424773	0.424402	0.424385	0.423449	0.423358	0.424726	0.425735	0.424779	0.422473	0.422071	0.423338	0.423263	0.422407	0.42237	0.422596	0.421821	0.42081	0.421376	0.422192	0.421273	0.419821	0.418779	0.4177	0.417293	0.417674	0.418175	0.41854	0.418343	0.417945	0.417968	0.417912	0.417112	0.416447	0.416761	0.417084	0.417228	0.417714	0.417986	0.41787	0.417989
Sample-40	11.65	54.4187	31.8937	7.12824	0.489244	0.4917	0.491377	0.489128	0.487698	0.488113	0.490714	0.491694	0.48884	0.487643	0.489287	0.489868	0.489206	0.488708	0.488903	0.488958	0.488108	0.487824	0.488513	0.487463	0.48489	0.485141	0.488767	0.491344	0.490038	0.48691	0.485265	0.484759	0.482822	0.480626	0.481185	0.482904	0.48292	0.481823	0.481467	0.48193	0.481783	0.481013	0.480897	0.481461	0.481753	0.481428	0.480258	0.479054	0.479486
Sample-41	6.7	53.3021	31.5802	16.9568	0.526299	0.526195	0.526042	0.526822	0.527937	0.528903	0.529967	0.528568	0.524622	0.523499	0.525876	0.52672	0.524485	0.521824	0.520888	0.521122	0.521245	0.521648	0.522114	0.521644	0.520696	0.520056	0.519891	0.519635	0.519689	0.520929	0.521299	0.519198	0.516224	0.514711	0.516036	0.518393	0.518856	0.517857	0.51711	0.516192	0.515596	0.516919	0.518009	0.516698	0.51546	0.515832	0.515879	0.515513	0.516281
Sample-42	6.65	54.9954	33.8812	5.12784	0.518698	0.520316	0.520272	0.519827	0.518535	0.516254	0.516149	0.515899	0.513343	0.513847	0.517689	0.519723	0.518842	0.516801	0.516057	0.516838	0.517251	0.517583	0.51794	0.516514	0.514959	0.515886	0.517312	0.517219	0.51618	0.514955	0.513858	0.513216	0.512889	0.511832	0.510581	0.510497	0.510924	0.511407	0.512696	0.51313	0.510994	0.509333	0.509878	0.509878	0.508808	0.508337	0.507675	0.506323	0.506264
Sample-43	7.72	42.5583	26.0023	22.8064	0.55112	0.55174	0.551723	0.552537	0.553706	0.553461	0.553288	0.551895	0.548616	0.548498	0.551515	0.55343	0.553289	0.551346	0.549466	0.549003	0.54846	0.547662	0.547818	0.547445	0.54612	0.546948	0.549681	0.551365	0.551795	0.551227	0.549101	0.547156	0.547216	0.54756	0.546944	0.546513	0.546357	0.546182	0.546518	0.546101	0.543818	0.542686	0.544558	0.545853	0.544081	0.541585	0.540201	0.540144	0.541684
Sample-44	6.2	56.9619	34.7004	26.1536	0.536293	0.538065	0.54093	0.542593	0.54188	0.540168	0.539608	0.538035	0.535064	0.535559	0.538644	0.539443	0.537702	0.535748	0.536207	0.537573	0.536019	0.534712	0.536689	0.537165	0.534464	0.533579	0.535837	0.537634	0.537361	0.536202	0.534477	0.532385	0.530193	0.52798	0.527829	0.530428	0.532342	0.531927	0.531741	0.532514	0.532844	0.533119	0.532784	0.530857	0.529201	0.528857	0.528284	0.52742	0.528129
Sample-45	8.24	49.3728	29.7892	17.6082	0.569254	0.569185	0.569345	0.570849	0.571839	0.569866	0.568673	0.568863	0.567407	0.567037	0.568246	0.569424	0.570415	0.569404	0.568121	0.568424	0.568211	0.567333	0.566746	0.564894	0.562423	0.563672	0.568193	0.569993	0.567015	0.563661	0.563323	0.564465	0.564596	0.563027	0.560521	0.559102	0.559792	0.561252	0.562678	0.563262	0.562134	0.561337	0.561865	0.561821	0.560833	0.559883	0.559118	0.558568	0.558495
Sample-46	12.52	54.617	32.4361	11.9049	0.53528	0.536354	0.535214	0.532961	0.531955	0.531664	0.532278	0.531769	0.529901	0.531278	0.534857	0.535976	0.534272	0.532342	0.532192	0.532621	0.532273	0.532486	0.533543	0.532377	0.528962	0.528283	0.531485	0.534386	0.534534	0.53361	0.532933	0.531696	0.529943	0.528567	0.528442	0.530013	0.531472	0.5306	0.528833	0.527848	0.526828	0.526567	0.527123	0.526785	0.526378	0.525847	0.523806	0.522497	0.524035
Sample-47	9.22	52.0594	30.9177	14.142	0.579744	0.581186	0.582003	0.582412	0.582677	0.582749	0.584058	0.583611	0.578485	0.575017	0.57679	0.579093	0.5797	0.580326	0.581024	0.579963	0.577216	0.57546	0.575541	0.575138	0.573836	0.574272	0.577402	0.579632	0.578092	0.575396	0.573465	0.572535	0.573504	0.574099	0.572432	0.571697	0.573635	0.575222	0.575248	0.574777	0.573468	0.571774	0.570743	0.570721	0.571674	0.572454	0.571608	0.569609	0.567909
Sample-48	6.45	55.407	32.9653	18.4586	0.588406	0.587772	0.586991	0.587636	0.588208	0.587198	0.586998	0.58639	0.584063	0.584284	0.587157	0.587752	0.584662	0.581586	0.581859	0.583033	0.582587	0.582949	0.584287	0.583074	0.581052	0.582777	0.586493	0.587133	0.583298	0.578479	0.576574	0.577768	0.579109	0.57863	0.577943	0.578297	0.578733	0.57844	0.578263	0.578804	0.578733	0.57838	0.578159	0.576564	0.57479	0.574551	0.574191	0.57334	0.573938
Sample-49	6.15	55.2888	33.795	19.678	0.592783	0.594929	0.594885	0.593069	0.591091	0.590716	0.593073	0.594666	0.593247	0.591652	0.590814	0.590404	0.589757	0.588133	0.586825	0.586689	0.587677	0.589098	0.589794	0.589206	0.588099	0.588178	0.590091	0.592192	0.591372	0.587903	0.585024	0.583923	0.584045	0.584168	0.583315	0.582642	0.583336	0.583714	0.582771	0.581984	0.581532	0.581126	0.581062	0.581248	0.581772	0.582012	0.580915	0.580808	0.58378
Sample-50	7.18	51.7625	29.7768	21.4307	0.436394	0.437194	0.436424	0.435779	0.436091	0.43651	0.436783	0.435831	0.434525	0.435104	0.435862	0.435105	0.433345	0.431889	0.43288	0.434801	0.434867	0.434344	0.434309	0.433578	0.432205	0.432042	0.433654	0.434853	0.433946	0.432448	0.431577	0.430954	0.430323	0.428809	0.427267	0.427759	0.429427	0.430287	0.430396	0.430243	0.429142	0.427692	0.426933	0.426541	0.426517	0.42691	0.42684	0.425945	0.425696
Sample-51	9.93	52.3626	31.0507	11.1308	0.581248	0.580855	0.578618	0.577214	0.578146	0.579534	0.581653	0.580927	0.576124	0.575482	0.579286	0.579676	0.575705	0.57187	0.571822	0.574278	0.575182	0.574536	0.574092	0.572741	0.570592	0.571647	0.576897	0.580576	0.578907	0.575312	0.572748	0.570204	0.567249	0.565788	0.566812	0.56869	0.569665	0.569797	0.569715	0.567932	0.564446	0.563646	0.566517	0.568415	0.566406	0.562462	0.559225	0.557862	0.559845
Sample-52	5.65	48.5756	29.1468	30.8095	0.568228	0.571143	0.572068	0.570104	0.56679	0.563311	0.562873	0.563413	0.561387	0.560961	0.564887	0.569283	0.56905	0.56491	0.563628	0.565551	0.56486	0.562689	0.562607	0.561638	0.558907	0.559565	0.564424	0.567854	0.566675	0.563715	0.561145	0.55858	0.555816	0.55311	0.552733	0.5557	0.559007	0.560261	0.559721	0.558213	0.556292	0.554899	0.554513	0.554196	0.553591	0.553465	0.553588	0.553695	0.554462
Sample-53	6.65	54.0848	31.8241	17.4633	0.448072	0.448916	0.448145	0.447028	0.446378	0.444965	0.444296	0.44467	0.444465	0.444513	0.445409	0.446694	0.446777	0.444734	0.443124	0.443262	0.443608	0.444153	0.444971	0.443916	0.441455	0.440611	0.442058	0.444486	0.445234	0.442495	0.439654	0.440483	0.442584	0.442989	0.442923	0.44346	0.443748	0.442872	0.441697	0.441331	0.440841	0.440057	0.439399	0.43836	0.437651	0.43787	0.437842	0.437136	0.437224
Sample-54	7.95	49.5361	31.3029	19.4356	0.599383	0.600592	0.601019	0.600649	0.599074	0.597017	0.597485	0.597482	0.594387	0.593205	0.593927	0.593874	0.593079	0.590585	0.588926	0.589744	0.590291	0.590888	0.592359	0.591583	0.588945	0.589708	0.594299	0.597277	0.595989	0.592836	0.58969	0.587094	0.585777	0.585256	0.585197	0.586078	0.58688	0.586591	0.586619	0.587298	0.586861	0.585223	0.583707	0.583075	0.582956	0.58258	0.581566	0.580066	0.579181
Sample-55	9.13	49.3928	28.3591	12.1374	0.59574	0.596689	0.597723	0.5978	0.596841	0.595054	0.594337	0.59347	0.591305	0.591961	0.59527	0.596001	0.593409	0.590709	0.589755	0.589713	0.589353	0.589166	0.589686	0.588964	0.586638	0.586439	0.589108	0.590684	0.589866	0.588645	0.586857	0.584713	0.583392	0.581571	0.580496	0.581757	0.582382	0.581818	0.582364	0.583176	0.58271	0.582278	0.581859	0.580302	0.579743	0.580501	0.580536	0.580824	0.581755
Sample-56	10.89	52.7965	30.4601	18.2086	0.652863	0.657612	0.66003	0.658896	0.656082	0.653262	0.652544	0.653349	0.653503	0.653729	0.654016	0.651335	0.646341	0.644323	0.647381	0.650909	0.651344	0.650669	0.649878	0.647675	0.64535	0.646233	0.649679	0.650035	0.645942	0.642578	0.642089	0.642756	0.643212	0.642187	0.640708	0.640931	0.641466	0.640509	0.639155	0.638197	0.637575	0.638294	0.640085	0.640362	0.638686	0.637372	0.636802	0.636389	0.636806
Sample-57	5.92	53.7344	29.7268	16.8533	0.66345	0.663789	0.66614	0.668196	0.6673	0.664774	0.664498	0.664184	0.660398	0.658545	0.661572	0.664378	0.663418	0.660712	0.660375	0.661703	0.661054	0.6587	0.657058	0.656505	0.655753	0.655891	0.659112	0.662141	0.66156	0.659888	0.658077	0.655731	0.653055	0.649537	0.648396	0.650375	0.650609	0.648679	0.648276	0.649143	0.649557	0.650955	0.652361	0.65065	0.647802	0.646618	0.645218	0.642957	0.643946
Sample-58	5.1	49.8119	29.1968	22.8411	0.452495	0.453292	0.453263	0.453994	0.455323	0.454227	0.453063	0.453405	0.452216	0.450681	0.451377	0.452825	0.452613	0.451273	0.451788	0.453693	0.453257	0.450798	0.449316	0.448868	0.44886	0.44938	0.450178	0.450825	0.450461	0.449579	0.449309	0.449624	0.449639	0.448919	0.448389	0.448069	0.446998	0.44576	0.445937	0.446231	0.444478	0.443169	0.44439	0.445587	0.445359	0.44521	0.445794	0.44658	0.446512
Sample-59	5.65	55.2531	32.4361	16.1181	0.692664	0.695792	0.695506	0.693846	0.694031	0.694784	0.695036	0.691914	0.686253	0.685102	0.688549	0.691292	0.69083	0.687116	0.683777	0.684508	0.688191	0.691734	0.692878	0.689831	0.684619	0.682637	0.684294	0.685125	0.684055	0.683398	0.683488	0.683082	0.681648	0.680667	0.681384	0.681547	0.680293	0.679631	0.679053	0.677077	0.675448	0.675983	0.676486	0.675511	0.675205	0.675221	0.673898	0.673407	0.674706
Sample-60	4.96	52.0387	30.1738	18.8485	0.688473	0.691772	0.695523	0.697219	0.697054	0.695321	0.69494	0.695512	0.693596	0.690295	0.687815	0.686906	0.68541	0.682273	0.682608	0.68549	0.685648	0.686033	0.688104	0.686009	0.679877	0.677693	0.680919	0.683402	0.682145	0.679331	0.677848	0.677575	0.676336	0.67517	0.67652	0.678269	0.677485	0.676178	0.676841	0.677463	0.676806	0.677369	0.678172	0.676281	0.673702	0.672458	0.671267	0.670477	0.671748
Sample-61	11.6	43.4372	23.9818	14.3321	0.668994	0.669946	0.672356	0.675182	0.674583	0.671188	0.67023	0.669918	0.667593	0.666834	0.668083	0.669294	0.669217	0.666247	0.662782	0.661615	0.662112	0.663925	0.664737	0.661823	0.658731	0.659697	0.664105	0.667835	0.667124	0.663182	0.659305	0.657465	0.656626	0.654994	0.654469	0.655512	0.655934	0.656196	0.657711	0.658172	0.655723	0.653815	0.653724	0.653337	0.653445	0.654257	0.652662	0.649231	0.649561
Sample-62	7.96	41.1892	22.0053	6.42387	0.422117	0.422329	0.422245	0.421887	0.42187	0.422131	0.422956	0.422745	0.42089	0.420357	0.422259	0.42441	0.423948	0.421213	0.420345	0.421503	0.421171	0.420243	0.42091	0.421386	0.420723	0.420477	0.42094	0.421801	0.422644	0.422788	0.422282	0.421032	0.419196	0.41781	0.418136	0.419768	0.420522	0.420085	0.419535	0.418719	0.417096	0.415563	0.414997	0.414642	0.414599	0.415308	0.416148	0.41675	0.416882
Sample-63	11.87	33.9409	16.7264	9.13517	0.689378	0.690509	0.691179	0.69133	0.688372	0.684776	0.685628	0.685639	0.68119	0.679579	0.68314	0.686096	0.684529	0.680975	0.679855	0.679851	0.678417	0.677786	0.678603	0.677827	0.676403	0.677053	0.678885	0.680525	0.680712	0.678807	0.676486	0.675179	0.673802	0.671521	0.669834	0.669323	0.669418	0.670023	0.670741	0.670941	0.670159	0.668752	0.667661	0.667168	0.667279	0.667583	0.666609	0.665331	0.666034
Sample-64	7.03	41.5404	22.8379	9.99763	0.65503	0.655837	0.655291	0.654153	0.651798	0.648192	0.647257	0.647787	0.647463	0.649717	0.653151	0.653062	0.649947	0.647722	0.649141	0.651023	0.650173	0.649307	0.649174	0.647338	0.645225	0.644788	0.64461	0.64381	0.642401	0.64136	0.641894	0.642815	0.641637	0.638217	0.636763	0.638302	0.638285	0.635705	0.633558	0.633275	0.634704	0.636981	0.638025	0.637113	0.635413	0.633315	0.631214	0.630721	0.632427
Sample-65	7.53	52.3583	29.342	12.5489	0.643856	0.647997	0.648221	0.644981	0.641628	0.639775	0.639864	0.63948	0.637168	0.636497	0.637711	0.637101	0.63465	0.632937	0.633922	0.63641	0.636602	0.633856	0.631493	0.63036	0.628921	0.628913	0.631484	0.633143	0.632033	0.630465	0.629593	0.62859	0.626913	0.625315	0.626111	0.627991	0.627327	0.625664	0.624993	0.624008	0.62312	0.623583	0.62403	0.623218	0.622255	0.621509	0.620012	0.618945	0.620385
Sample-66	7.3	46.7647	26.3034	13.6916	0.652288	0.656169	0.660407	0.664146	0.664602	0.662263	0.661678	0.659287	0.65361	0.651842	0.654539	0.65703	0.656489	0.652886	0.650308	0.650099	0.649588	0.648615	0.648387	0.647642	0.646544	0.648192	0.652065	0.654244	0.653566	0.651447	0.648292	0.644841	0.642694	0.642043	0.642879	0.644184	0.643864	0.642759	0.643127	0.644407	0.64507	0.645649	0.645387	0.642697	0.639656	0.638075	0.637061	0.636992	0.638957
Sample-67	7.85	46.0894	25.342	10.3543	0.409639	0.409153	0.408261	0.408435	0.40848	0.4077	0.40868	0.410011	0.408697	0.407154	0.406722	0.405928	0.404682	0.403445	0.403551	0.405477	0.406552	0.406099	0.405971	0.40503	0.403216	0.403125	0.40446	0.405519	0.40573	0.405295	0.404274	0.402862	0.402384	0.402738	0.402745	0.402807	0.402683	0.401869	0.401417	0.401042	0.399902	0.399009	0.399097	0.399103	0.397369	0.394542	0.39314	0.394267	0.39715
Sample-68	16.07	29.2176	15.7519	25.4992	0.669157	0.671181	0.670885	0.670979	0.669978	0.665458	0.66235	0.661392	0.660174	0.66079	0.661683	0.660594	0.658706	0.656076	0.655222	0.657084	0.657321	0.656276	0.657058	0.657661	0.657165	0.658712	0.661969	0.66166	0.657071	0.653129	0.650963	0.6497	0.649406	0.649033	0.649047	0.650494	0.652492	0.653283	0.653124	0.653327	0.652894	0.652236	0.652549	0.651787	0.649063	0.646126	0.643888	0.643766	0.646762
Sample-69	16.5	24.6601	13.5753	29.501	0.433717	0.435429	0.436258	0.435972	0.435719	0.43562	0.435924	0.435442	0.433364	0.432605	0.434054	0.434907	0.433687	0.4323	0.432392	0.432612	0.432435	0.432869	0.433245	0.431957	0.431113	0.43372	0.437167	0.437328	0.43505	0.432839	0.430683	0.429724	0.430399	0.430522	0.430266	0.43015	0.429547	0.428754	0.428443	0.428498	0.428535	0.429102	0.430109	0.43044	0.429562	0.428021	0.426441	0.426251	0.4283
Sample-70	12.78	24.4095	13.6703	33.8698	0.757117	0.759506	0.761889	0.762683	0.761655	0.759145	0.758432	0.757449	0.752667	0.749088	0.750692	0.754201	0.754848	0.751526	0.747504	0.745176	0.743619	0.742754	0.744051	0.74527	0.74396	0.743886	0.747052	0.749494	0.749387	0.74825	0.74677	0.74527	0.743336	0.741213	0.740665	0.74122	0.741404	0.741637	0.742694	0.742963	0.740783	0.738587	0.737973	0.736833	0.735307	0.735627	0.735788	0.734067	0.733331
Sample-71	13.22	26.9461	14.6384	34.5829	0.747983	0.748184	0.75054	0.752178	0.751087	0.748831	0.750136	0.751843	0.747899	0.743889	0.74578	0.74955	0.749289	0.744673	0.740701	0.73911	0.736675	0.733976	0.733829	0.73476	0.735416	0.738254	0.743041	0.745499	0.744413	0.74201	0.739924	0.738911	0.737707	0.735711	0.734924	0.734021	0.731529	0.730439	0.732793	0.735377	0.733214	0.729759	0.730732	0.732818	0.732258	0.730667	0.730301	0.73143	0.733578
Sample-72	17.05	34.1536	18.3512	19.0784	0.453893	0.454946	0.456662	0.45696	0.456476	0.457054	0.45893	0.458833	0.456057	0.455389	0.457243	0.457815	0.456554	0.455191	0.455338	0.455953	0.454788	0.453547	0.454665	0.455604	0.454239	0.453036	0.453419	0.454316	0.454749	0.454301	0.452741	0.450741	0.449457	0.449396	0.451109	0.453357	0.453644	0.452337	0.451242	0.449799	0.447614	0.44691	0.448171	0.449514	0.450329	0.45076	0.450153	0.448692	0.448095
Sample-73	13.29	26.8288	14.1683	33.9968	0.757344	0.757573	0.758725	0.761913	0.761786	0.757604	0.755687	0.754416	0.752189	0.752591	0.753512	0.753069	0.751843	0.74942	0.749511	0.75171	0.751317	0.750769	0.751801	0.749956	0.745571	0.743874	0.746199	0.749506	0.748917	0.744604	0.743123	0.74637	0.749168	0.747821	0.745246	0.744898	0.744681	0.743012	0.742687	0.742668	0.740361	0.739121	0.739796	0.739484	0.739739	0.740988	0.740593	0.74055	0.742859
Sample-74	13.57	26.7534	14.774	25.2026	0.669384	0.674208	0.675083	0.674044	0.672954	0.671643	0.671247	0.669826	0.666089	0.664431	0.666466	0.668534	0.668005	0.665977	0.665534	0.666397	0.6657	0.664457	0.665244	0.665877	0.663975	0.662865	0.664001	0.663971	0.662702	0.662235	0.661164	0.658135	0.654581	0.652401	0.65291	0.655492	0.656744	0.6554	0.654715	0.655558	0.655171	0.653919	0.653601	0.653834	0.654541	0.655746	0.656062	0.654833	0.654053
Sample-75	14.14	27.3338	14.9029	32.594	0.693301	0.693368	0.693333	0.693332	0.692419	0.691809	0.693638	0.693005	0.689396	0.68911	0.692018	0.69502	0.695732	0.693147	0.69138	0.692159	0.691753	0.689063	0.686413	0.68349	0.680519	0.681533	0.685256	0.686372	0.68527	0.684109	0.682569	0.680971	0.680186	0.680017	0.680063	0.679165	0.676794	0.675491	0.676817	0.678637	0.678569	0.676849	0.675853	0.676872	0.678432	0.678906	0.678395	0.677303	0.676386
Sample-76	16.43	23.822	12.8037	34.1336	0.646885	0.648988	0.651598	0.652875	0.652346	0.649879	0.648594	0.649477	0.649332	0.648125	0.647521	0.648551	0.650383	0.649238	0.646422	0.645732	0.644638	0.642172	0.641611	0.641573	0.640657	0.641718	0.644493	0.645692	0.644319	0.642233	0.640474	0.639302	0.639623	0.639772	0.63854	0.638286	0.639312	0.63888	0.636814	0.635527	0.635932	0.636854	0.636054	0.633124	0.631425	0.632477	0.632662	0.631232	0.631935
Sample-77	13.08	25.3809	13.2303	37.8751	0.549026	0.550544	0.55043	0.549978	0.549492	0.549066	0.550767	0.550994	0.547155	0.545208	0.547404	0.549851	0.549728	0.547264	0.545923	0.547039	0.548155	0.548316	0.547953	0.546849	0.54507	0.544101	0.545325	0.546597	0.54572	0.544578	0.544087	0.543685	0.543203	0.541319	0.539517	0.540883	0.543641	0.543774	0.541165	0.539675	0.540872	0.541704	0.540127	0.537649	0.536346	0.536252	0.536021	0.536359	0.538906
Sample-78	16.39	28.1352	15.6875	27.6664	0.541427	0.543273	0.54329	0.542772	0.541586	0.540357	0.541873	0.541805	0.537291	0.535861	0.539606	0.542883	0.542681	0.54019	0.539461	0.540757	0.540599	0.539795	0.539974	0.539023	0.537048	0.537439	0.540139	0.541236	0.539302	0.537006	0.5359	0.535401	0.534776	0.533481	0.532503	0.532634	0.53358	0.534919	0.53501	0.533093	0.531471	0.531899	0.532225	0.530304	0.527821	0.526793	0.526896	0.527762	0.529307
Sample-79	12.08	25.6903	14.0147	41.9991	0.548167	0.550979	0.552597	0.551732	0.548591	0.544955	0.544731	0.545233	0.542754	0.542146	0.545431	0.547602	0.545995	0.543004	0.542233	0.543355	0.543798	0.543806	0.54419	0.543666	0.54178	0.541261	0.543596	0.545228	0.543707	0.541709	0.541524	0.542205	0.541412	0.538532	0.536702	0.538056	0.539436	0.538317	0.53666	0.5355	0.534382	0.533976	0.534253	0.534434	0.534645	0.534745	0.533813	0.533405	0.535501
Sample-80	10.11	21.2885	11.6659	41.9509	0.630386	0.632303	0.633622	0.632056	0.628033	0.624444	0.625913	0.628836	0.628137	0.627986	0.629415	0.629134	0.627005	0.624553	0.624101	0.625115	0.624418	0.623319	0.624494	0.624871	0.622848	0.622735	0.625605	0.627159	0.625573	0.623091	0.621012	0.62044	0.621185	0.620416	0.618481	0.617937	0.618815	0.619666	0.62042	0.620846	0.619933	0.619927	0.621122	0.619657	0.616732	0.616166	0.616128	0.614733	0.615221
Sample-81	19.18	35.1382	18.3486	16.3338	0.683361	0.680735	0.680485	0.682458	0.682247	0.679758	0.680999	0.682665	0.679911	0.678785	0.681107	0.682944	0.68284	0.680478	0.678228	0.677715	0.677374	0.676172	0.673958	0.671415	0.670572	0.673185	0.67802	0.680053	0.676897	0.672868	0.670688	0.669551	0.668314	0.665011	0.662325	0.664722	0.669393	0.671706	0.671286	0.669594	0.667938	0.666409	0.664944	0.663443	0.661553	0.661266	0.662774	0.66354	0.664565
Sample-82	12.88	32.7151	15.4962	25.4422	0.576763	0.578944	0.578772	0.57685	0.575163	0.574876	0.576071	0.575771	0.573339	0.571866	0.571298	0.571592	0.573617	0.574159	0.572464	0.571519	0.571737	0.572848	0.573649	0.5715	0.568603	0.569152	0.571437	0.571493	0.569377	0.567683	0.566873	0.566329	0.566915	0.568084	0.568223	0.567225	0.565761	0.564645	0.564495	0.564525	0.563605	0.562333	0.561317	0.560535	0.560484	0.560677	0.559853	0.559452	0.561293
Sample-83	16.27	35.2267	18.2918	21.4321	0.654608	0.655352	0.65783	0.659571	0.659677	0.658081	0.656996	0.655002	0.651991	0.652247	0.65454	0.655411	0.653721	0.650327	0.650288	0.653358	0.652906	0.650029	0.649894	0.650312	0.647788	0.64587	0.648382	0.651799	0.65156	0.648989	0.646846	0.645945	0.646017	0.645657	0.644327	0.643584	0.643533	0.643653	0.645351	0.647084	0.645765	0.64278	0.640939	0.641118	0.642438	0.642987	0.641981	0.640891	0.641421
Sample-84	15.57	34.6249	18.7232	20.7086	0.64264	0.642416	0.64296	0.644676	0.646119	0.645372	0.644051	0.641078	0.637053	0.637351	0.639948	0.640226	0.639169	0.637431	0.636067	0.637189	0.639725	0.64142	0.640754	0.637775	0.636901	0.640964	0.644926	0.643852	0.640251	0.636955	0.633518	0.631381	0.63069	0.629469	0.629812	0.633333	0.636003	0.634729	0.632594	0.632075	0.63199	0.63188	0.630683	0.628618	0.628343	0.629409	0.629972	0.630198	0.630163
Sample-85	16.57	44.1453	25.7486	7.55237	0.637438	0.638193	0.638586	0.637958	0.635581	0.633549	0.634618	0.636348	0.635862	0.635005	0.63432	0.633874	0.634417	0.634092	0.632789	0.632985	0.634434	0.635343	0.634838	0.631986	0.628091	0.626819	0.629364	0.632736	0.633586	0.632164	0.630369	0.629607	0.629652	0.628687	0.627051	0.626871	0.627814	0.627555	0.626654	0.626373	0.625097	0.623179	0.622197	0.621572	0.621339	0.621695	0.620981	0.61977	0.620558
Sample-86	17.86	47.1728	26.5915	17.7696	0.431301	0.433624	0.435182	0.434499	0.432351	0.430515	0.430767	0.431635	0.431222	0.431001	0.431955	0.432971	0.432555	0.430943	0.430223	0.430416	0.429601	0.428402	0.428061	0.427252	0.426338	0.427004	0.427895	0.427997	0.427941	0.427467	0.427059	0.42779	0.428823	0.428368	0.426579	0.425071	0.424516	0.42526	0.427123	0.427893	0.42639	0.424804	0.42431	0.423478	0.422457	0.422592	0.423284	0.424022	0.425731
Sample-87	17.2	47.2448	27.5087	9.25724	0.678368	0.679959	0.680504	0.678579	0.675614	0.674508	0.678174	0.681249	0.6799	0.679184	0.680341	0.681907	0.682362	0.679224	0.676074	0.675433	0.673836	0.672551	0.673536	0.672264	0.669254	0.670792	0.675887	0.678638	0.676752	0.672624	0.670348	0.670864	0.671801	0.671425	0.669423	0.667313	0.666832	0.667043	0.667551	0.668765	0.669014	0.668092	0.667139	0.665712	0.664628	0.664942	0.665072	0.664152	0.664039
Sample-88	17.31	44.4416	26.5843	4.61547	0.631828	0.634881	0.637164	0.639136	0.639935	0.63731	0.635351	0.634499	0.631963	0.631286	0.632836	0.633733	0.633928	0.633204	0.631873	0.630608	0.629497	0.629898	0.631863	0.631265	0.627115	0.624783	0.626879	0.630182	0.63072	0.627802	0.624169	0.622736	0.622836	0.622415	0.622735	0.624683	0.625587	0.624904	0.624877	0.624496	0.62247	0.621378	0.621807	0.621855	0.62189	0.621917	0.620858	0.620449	0.621741
Sample-89	17.58	40.3291	22.6434	9.90431	0.60418	0.605046	0.605896	0.607151	0.607725	0.606538	0.606186	0.605348	0.602815	0.603442	0.607192	0.609673	0.608969	0.60462	0.601407	0.60309	0.604642	0.603366	0.602198	0.600497	0.597188	0.595782	0.598119	0.600796	0.600578	0.598472	0.596703	0.596122	0.596648	0.597995	0.599423	0.599029	0.597005	0.596608	0.598394	0.598775	0.597135	0.597023	0.597774	0.596097	0.593705	0.593273	0.593589	0.593747	0.594627
Sample-90	17.86	44.1121	25.8548	15.4032	0.474728	0.475306	0.475019	0.475426	0.476867	0.477041	0.477286	0.477878	0.476339	0.474287	0.473879	0.4747	0.475695	0.475878	0.475673	0.475377	0.474764	0.474713	0.475676	0.475857	0.474475	0.473029	0.472089	0.471673	0.471908	0.472677	0.473246	0.472986	0.471887	0.470265	0.470201	0.472219	0.473574	0.473139	0.472333	0.471481	0.470331	0.469858	0.46901	0.466369	0.464143	0.464254	0.465586	0.46692	0.468209
Sample-91	15	50.088	28.7756	3.94921	0.749879	0.753461	0.753982	0.751601	0.748004	0.745836	0.749056	0.751348	0.747366	0.74613	0.749571	0.750373	0.747497	0.743878	0.743046	0.744418	0.74434	0.744115	0.744852	0.743325	0.73935	0.737799	0.741448	0.744425	0.741032	0.736608	0.735594	0.735987	0.735528	0.733167	0.732113	0.734592	0.736355	0.735072	0.734242	0.733935	0.731086	0.728353	0.72832	0.729283	0.730926	0.732575	0.730801	0.726111	0.723612
Sample-92	11.84	52.338	30.4664	9.29385	0.701912	0.700426	0.698092	0.699311	0.702373	0.703842	0.705904	0.704605	0.6981	0.695085	0.697422	0.700507	0.700917	0.697628	0.695869	0.697249	0.696685	0.694625	0.694427	0.693796	0.691099	0.690868	0.695165	0.697643	0.695064	0.693736	0.694393	0.691896	0.68716	0.683159	0.68179	0.683993	0.68627	0.684997	0.683104	0.683447	0.683552	0.683047	0.683385	0.682963	0.680485	0.678048	0.677529	0.67762	0.67748
Sample-93	11.35	53.3844	29.6702	5.32962	0.717531	0.718669	0.718203	0.715492	0.711121	0.7083	0.709583	0.710733	0.709614	0.710872	0.71353	0.713552	0.711247	0.707414	0.7044	0.70384	0.703839	0.704337	0.705909	0.705483	0.702691	0.701993	0.704246	0.70621	0.706338	0.70467	0.70138	0.698985	0.699231	0.699327	0.697693	0.695822	0.694176	0.694028	0.696967	0.699449	0.698095	0.695717	0.69427	0.692631	0.691598	0.692524	0.694023	0.694605	0.694689
Sample-94	11.7	52.7577	30.6327	5.8591	0.752279	0.75201	0.754181	0.755104	0.755296	0.754748	0.754707	0.754138	0.753031	0.754786	0.756632	0.7571	0.75738	0.754712	0.752048	0.752631	0.753169	0.752914	0.752317	0.750099	0.747443	0.74717	0.749954	0.753383	0.753949	0.749361	0.741603	0.736769	0.736826	0.738301	0.740413	0.74313	0.743333	0.741524	0.741968	0.743891	0.743355	0.741138	0.739917	0.73901	0.736858	0.734622	0.734296	0.7363	0.738937
Sample-95	22.05	27.4462	14.3498	17.3389	0.735167	0.737536	0.737644	0.73498	0.733503	0.733038	0.732779	0.730281	0.726081	0.72635	0.729613	0.730784	0.729696	0.727561	0.726442	0.726811	0.727786	0.729616	0.730325	0.726892	0.722089	0.722075	0.726011	0.727814	0.727079	0.726031	0.72333	0.719861	0.717507	0.714711	0.712732	0.714168	0.716498	0.716758	0.715305	0.712937	0.710366	0.709638	0.711344	0.71317	0.714188	0.714909	0.713939	0.710653	0.707408
Sample-96	22.74	26.8283	18.2634	16.5702	0.737382	0.738746	0.738621	0.738622	0.738583	0.73626	0.736479	0.738548	0.735637	0.730608	0.729254	0.732341	0.735356	0.732703	0.728587	0.728935	0.729433	0.726888	0.726413	0.728101	0.727468	0.727359	0.730282	0.731769	0.729672	0.726836	0.724268	0.721607	0.720895	0.722216	0.722041	0.719853	0.718359	0.718927	0.721728	0.723644	0.721815	0.719795	0.719204	0.717971	0.717262	0.717765	0.7179	0.718141	0.719389
Sample-97	22.11	33.9063	17.889	23.0959	0.697071	0.696701	0.6974	0.700166	0.702756	0.701193	0.698851	0.697148	0.695846	0.697158	0.698366	0.698018	0.697181	0.69573	0.695665	0.696	0.694354	0.692636	0.691681	0.689246	0.68562	0.684446	0.687788	0.692285	0.691748	0.686932	0.683002	0.680946	0.680462	0.680774	0.68118	0.682038	0.682117	0.682363	0.68456	0.685079	0.68221	0.680275	0.680655	0.680344	0.678377	0.676973	0.677346	0.677709	0.676923
Sample-98	23.71	36.5463	19.6599	13.3891	0.783325	0.782215	0.778801	0.778285	0.779703	0.778965	0.780569	0.781437	0.777044	0.776114	0.780298	0.781795	0.778436	0.773957	0.773685	0.7771	0.779171	0.779383	0.778817	0.775646	0.771124	0.771201	0.776549	0.779206	0.775957	0.773147	0.772627	0.771286	0.76912	0.7674	0.767976	0.770531	0.771067	0.768627	0.766731	0.766766	0.767158	0.76933	0.773312	0.77307	0.768471	0.76608	0.765238	0.762941	0.762323
Sample-99	22.71	37.5737	20.6174	13.1438	0.399609	0.401239	0.400798	0.398692	0.39786	0.397864	0.398901	0.399009	0.396473	0.395679	0.398077	0.399814	0.398666	0.395983	0.394909	0.395903	0.396838	0.396799	0.396235	0.39558	0.39478	0.394624	0.396059	0.397404	0.39623	0.393427	0.391848	0.391661	0.391131	0.390498	0.390703	0.391147	0.390513	0.389138	0.389088	0.390175	0.390245	0.389261	0.388342	0.387663	0.387468	0.388123	0.388924	0.389001	0.388665
Sample-100	9.44	35.3906	18.8723	27.4232	0.811435	0.813573	0.81553	0.815143	0.81263	0.810645	0.809944	0.808406	0.805395	0.80364	0.805259	0.808372	0.807546	0.803228	0.802101	0.80474	0.806518	0.805607	0.803087	0.798582	0.79273	0.790329	0.794111	0.799477	0.799938	0.796238	0.793289	0.793472	0.795221	0.795604	0.795075	0.794354	0.7924	0.789707	0.788248	0.788487	0.789429	0.790541	0.789212	0.785491	0.785688	0.789674	0.789815	0.785993	0.783975
Sample-101	5.11	33.667	17.6751	51.5157	0.8365	0.838837	0.843005	0.845421	0.842882	0.83972	0.840499	0.840111	0.834582	0.829997	0.832139	0.837835	0.839692	0.83666	0.833364	0.831514	0.831351	0.8345	0.838968	0.839905	0.836603	0.832724	0.832271	0.833719	0.832624	0.83168	0.833397	0.832842	0.828691	0.824961	0.823124	0.823379	0.824087	0.823013	0.822983	0.824699	0.825692	0.826053	0.824486	0.820927	0.819833	0.82146	0.821004	0.819295	0.819993
Sample-102	4.55	34.8188	18.1078	39.0608	0.800875	0.799682	0.79819	0.798284	0.797246	0.794399	0.794832	0.796787	0.793683	0.790121	0.791511	0.794065	0.794213	0.792454	0.790816	0.790691	0.791908	0.79424	0.795524	0.7918	0.784614	0.780904	0.783091	0.786347	0.78698	0.786615	0.786161	0.785244	0.78424	0.78286	0.781545	0.780633	0.779471	0.778283	0.777589	0.777277	0.776942	0.776825	0.776527	0.774573	0.772591	0.772794	0.772619	0.771139	0.772012
Sample-103	4.45	35.8046	18.6862	39.9024	0.467387	0.467649	0.467653	0.467677	0.467798	0.467706	0.468903	0.469524	0.467296	0.466097	0.467579	0.468928	0.467789	0.465038	0.464604	0.46661	0.468129	0.468222	0.466425	0.463531	0.462301	0.46341	0.465145	0.466146	0.465922	0.465159	0.464667	0.464105	0.462839	0.461462	0.461451	0.462336	0.462695	0.462735	0.462593	0.461626	0.460387	0.460005	0.46001	0.459755	0.45937	0.458495	0.457011	0.455673	0.455871
Sample-104	11.72	38.6921	20.7449	27.6814	0.500354	0.500742	0.500723	0.501437	0.501738	0.501026	0.501675	0.502225	0.50081	0.499883	0.499583	0.499187	0.499007	0.498154	0.497409	0.497365	0.496746	0.496292	0.496857	0.496064	0.494103	0.494242	0.49644	0.498464	0.498874	0.49751	0.495772	0.495075	0.493985	0.491536	0.490832	0.49282	0.494319	0.493965	0.493659	0.494059	0.493505	0.492152	0.491755	0.49233	0.492622	0.492008	0.490777	0.490318	0.491218
Sample-105	13.81	33.4436	18.4721	25.6192	0.521961	0.523254	0.522717	0.522489	0.52462	0.526941	0.528814	0.528114	0.524091	0.522009	0.52255	0.522561	0.52051	0.517278	0.517043	0.519385	0.519827	0.518384	0.517398	0.516012	0.514043	0.515668	0.521178	0.52407	0.521495	0.517853	0.516109	0.515743	0.515878	0.515107	0.513855	0.513322	0.512806	0.512601	0.513695	0.514295	0.512722	0.51134	0.511667	0.51138	0.509672	0.509189	0.510117	0.510545	0.511438
Sample-106	5.55	42.0229	23.2983	32.4219	0.526647	0.527177	0.527233	0.527809	0.528157	0.525969	0.524325	0.524286	0.523443	0.524017	0.5265	0.528008	0.527516	0.525396	0.523077	0.52112	0.51949	0.51939	0.520373	0.519815	0.519278	0.522542	0.527439	0.528529	0.524809	0.521028	0.520325	0.521061	0.521163	0.519673	0.517626	0.517097	0.518052	0.518965	0.519535	0.519408	0.517902	0.517015	0.518273	0.519632	0.519705	0.519708	0.518728	0.515564	0.513895
Sample-107	16.62	36.0061	20.1744	15.9753	0.512389	0.513312	0.513894	0.514565	0.514729	0.513184	0.512834	0.512637	0.510217	0.510155	0.513456	0.515337	0.513583	0.51074	0.511489	0.514266	0.513737	0.510881	0.509223	0.507962	0.505919	0.505309	0.507064	0.508582	0.50809	0.506573	0.50525	0.505141	0.506059	0.506128	0.5058	0.506579	0.507606	0.508095	0.508084	0.506579	0.504406	0.504965	0.507109	0.506836	0.505204	0.504012	0.502347	0.501303	0.502317
Sample-108	11.06	42.504	23.5664	19.0536	0.501164	0.503387	0.505862	0.506469	0.504959	0.502576	0.502026	0.502101	0.500975	0.501726	0.503943	0.504045	0.502273	0.500804	0.5012	0.501656	0.499604	0.4981	0.499661	0.500357	0.49835	0.497479	0.499904	0.502383	0.501496	0.499104	0.497744	0.49721	0.496725	0.495367	0.49385	0.494498	0.496654	0.497511	0.497281	0.496765	0.495595	0.495482	0.496461	0.495786	0.494003	0.493115	0.492815	0.493227	0.494629
Sample-109	9.75	33.3948	19.1868	27.3795	0.557159	0.556345	0.555386	0.555843	0.557242	0.557099	0.557359	0.556953	0.554378	0.554546	0.557616	0.558891	0.55724	0.554917	0.554613	0.555072	0.554099	0.552951	0.552269	0.55044	0.547924	0.547962	0.551533	0.554957	0.554481	0.551464	0.549022	0.548179	0.548455	0.547867	0.546269	0.546044	0.547198	0.548095	0.548388	0.548134	0.547375	0.546788	0.546424	0.545069	0.543711	0.544925	0.54674	0.545829	0.544435
Sample-110	8.94	54.6518	31.4522	12.7067	0.580341	0.582812	0.585327	0.585108	0.583317	0.581843	0.581968	0.581546	0.578954	0.577693	0.578497	0.579518	0.579313	0.577098	0.575702	0.57675	0.577756	0.577349	0.576888	0.575973	0.574281	0.574523	0.576752	0.577924	0.576806	0.574639	0.573597	0.574113	0.573635	0.571639	0.571321	0.573048	0.573792	0.572572	0.571491	0.571197	0.570074	0.568682	0.568586	0.569296	0.569607	0.569663	0.569485	0.568085	0.567343
Sample-111	6.88	57.9309	34.2043	14.8691	0.582615	0.585313	0.587119	0.587754	0.586954	0.585088	0.584684	0.583224	0.57946	0.579398	0.582839	0.584538	0.582808	0.578969	0.577997	0.580315	0.580326	0.57846	0.578717	0.579257	0.577659	0.57661	0.578148	0.579951	0.579079	0.57636	0.574509	0.574701	0.575572	0.57466	0.573204	0.573461	0.573824	0.573687	0.575111	0.576414	0.575097	0.57359	0.573094	0.571618	0.569068	0.567447	0.566891	0.56563	0.564746
Sample-112	7.16	60.4683	36.1738	10.6675	0.575349	0.577233	0.57882	0.580313	0.581176	0.579979	0.579439	0.578513	0.575559	0.575336	0.577718	0.578663	0.578175	0.576836	0.575291	0.574483	0.573544	0.572072	0.57155	0.570864	0.569041	0.56915	0.572022	0.57452	0.574926	0.574128	0.57208	0.569533	0.568615	0.568652	0.569292	0.570993	0.571662	0.570627	0.570529	0.571316	0.56997	0.567525	0.566755	0.567018	0.567114	0.567219	0.567463	0.567487	0.567022
Sample-113	23.71	47.0729	25.368	14.9308	0.616063	0.618107	0.618299	0.618915	0.618119	0.614614	0.61321	0.612328	0.609183	0.608301	0.609891	0.61103	0.610938	0.609079	0.607598	0.607953	0.608084	0.608141	0.609118	0.607515	0.603279	0.602927	0.608219	0.612789	0.612316	0.610223	0.6096	0.609652	0.609667	0.609149	0.607791	0.606532	0.605232	0.604291	0.606007	0.607265	0.604265	0.601435	0.601586	0.601756	0.601455	0.601962	0.602011	0.600789	0.59947
Sample-114	22.3	38.0975	17.7418	13.2254	0.621151	0.622101	0.623457	0.626601	0.628059	0.625799	0.624725	0.623326	0.620676	0.620892	0.621664	0.620933	0.620305	0.620687	0.623979	0.627869	0.626067	0.62008	0.617042	0.615593	0.611488	0.610346	0.616363	0.622521	0.62316	0.620816	0.619184	0.620161	0.620705	0.617025	0.612937	0.611614	0.610537	0.609254	0.610137	0.611997	0.611803	0.611795	0.613852	0.614602	0.613872	0.613298	0.611886	0.610261	0.609715
Sample-115	22.94	34.1767	23.2961	11.7339	0.565571	0.567075	0.568828	0.570419	0.570629	0.568289	0.567642	0.568151	0.56634	0.565489	0.567308	0.569532	0.56913	0.564847	0.561897	0.563208	0.564541	0.564099	0.563457	0.562754	0.561866	0.561677	0.563135	0.564786	0.563863	0.560755	0.557881	0.556364	0.555945	0.556061	0.556778	0.558072	0.559126	0.559392	0.559212	0.558769	0.557809	0.556973	0.556463	0.555397	0.553895	0.552718	0.552839	0.554925	0.556738
Sample-116	25.53	43.9094	23.4279	8.62579	0.380341	0.382807	0.385126	0.384625	0.382019	0.37984	0.380509	0.382511	0.383366	0.383609	0.382887	0.382	0.381746	0.380682	0.379881	0.379914	0.37896	0.377857	0.378092	0.378301	0.377694	0.377499	0.378467	0.379971	0.380648	0.380351	0.380037	0.379434	0.377965	0.376609	0.376663	0.377571	0.377578	0.37686	0.376831	0.377232	0.377132	0.376499	0.375814	0.375189	0.374417	0.373825	0.3738	0.374256	0.375009
Sample-117	23.81	41.8246	20.2173	14.5739	0.555386	0.556618	0.557681	0.557466	0.555194	0.552543	0.553427	0.554273	0.551967	0.551648	0.553305	0.554332	0.554844	0.55363	0.553084	0.554211	0.552962	0.549593	0.548111	0.549047	0.549642	0.549988	0.552098	0.553928	0.552888	0.550053	0.546616	0.543614	0.542664	0.542896	0.543333	0.544668	0.545549	0.544787	0.544501	0.54484	0.543326	0.541971	0.5428	0.542764	0.542349	0.544239	0.545824	0.545086	0.544374
Sample-118	20.71	28.0124	17.6896	15.1858	0.550996	0.55164	0.550746	0.551258	0.553144	0.552149	0.550846	0.55104	0.549785	0.548707	0.549501	0.549616	0.547798	0.545152	0.543545	0.543619	0.543505	0.543314	0.544704	0.54557	0.54495	0.546451	0.55054	0.552448	0.549974	0.54597	0.543444	0.543572	0.545036	0.54477	0.543194	0.543159	0.544197	0.545332	0.546888	0.546876	0.544163	0.541869	0.541994	0.542484	0.54226	0.542138	0.541038	0.538795	0.538191
Sample-119	21.99	33.7964	16.875	10.7737	0.555131	0.556079	0.555702	0.555257	0.554419	0.552953	0.553208	0.55354	0.552126	0.552346	0.553543	0.552905	0.549995	0.546746	0.548711	0.554275	0.555438	0.552636	0.550396	0.548597	0.547205	0.547772	0.550352	0.553067	0.55333	0.551156	0.548592	0.546876	0.545937	0.545325	0.545291	0.545917	0.546835	0.547123	0.546676	0.546481	0.545991	0.54459	0.543153	0.542876	0.544919	0.547985	0.547523	0.543887	0.54319
Sample-120	27.64	31.3606	15.9398	13.8699	0.549154	0.552105	0.553575	0.552741	0.551871	0.551972	0.55358	0.55327	0.549484	0.54753	0.548862	0.550503	0.550432	0.548818	0.548463	0.549871	0.551106	0.551591	0.551162	0.548434	0.544666	0.544089	0.547185	0.549769	0.548347	0.545414	0.545254	0.547059	0.547186	0.544665	0.543108	0.544316	0.545654	0.54593	0.545647	0.544303	0.542268	0.541449	0.541683	0.541797	0.542435	0.542886	0.541678	0.54046	0.540854
Sample-121	30.6	43.044	21.4672	7.75417	0.586399	0.586964	0.586497	0.587041	0.587568	0.586074	0.586132	0.588523	0.589923	0.590317	0.589638	0.58809	0.586761	0.585466	0.58529	0.58611	0.585665	0.584336	0.583342	0.581299	0.578751	0.579427	0.583135	0.58516	0.584647	0.584407	0.583751	0.581106	0.577795	0.575963	0.577195	0.580728	0.582957	0.582067	0.580453	0.579248	0.577576	0.57693	0.578031	0.578267	0.576724	0.575292	0.574183	0.573931	0.576483
Sample-122	23.8	34.9514	19.0255	11.6744	0.593321	0.593997	0.594683	0.5948	0.591828	0.588153	0.589552	0.591364	0.589346	0.589761	0.593217	0.594022	0.591019	0.587946	0.588743	0.591018	0.59016	0.587716	0.586578	0.58499	0.582447	0.58303	0.587741	0.591376	0.590223	0.586839	0.585481	0.586975	0.58749	0.58435	0.581717	0.583218	0.585304	0.584502	0.583346	0.583183	0.581687	0.580799	0.582517	0.582709	0.580663	0.580058	0.579748	0.578032	0.5781
Sample-123	28.7	37.8262	19.3951	13.0911	0.661733	0.663358	0.662057	0.660499	0.659944	0.65881	0.659741	0.659784	0.655938	0.655747	0.659005	0.659263	0.657379	0.655057	0.653467	0.652718	0.651317	0.649999	0.650303	0.650171	0.648439	0.65047	0.657332	0.661357	0.659068	0.65477	0.651009	0.648524	0.648335	0.648309	0.648165	0.649724	0.650707	0.649618	0.649292	0.649623	0.648426	0.648509	0.649931	0.648302	0.646479	0.647836	0.647125	0.643171	0.642159
[truncated: 2,158 more columns]
